# Supplementary material
Source: publisher figshare collection journal article supplement (https://acs.figshare.com/ndownloader/files/4114363)
Supplement: Supplementary file 1 [file 4114363]

**An Electrochemical Method for Investigation of Conformational  
Flexibility of Active Sites of *Trametes versicolor* Laccase Based on  
Sensitive Determination of Copper Ion with Cysteine-Modified  
Electrodes**

Xianchan Li, Ping Yu, Lifan Yang, Fuyi Wang, and Lanqun Mao\*

*Beijing National Laboratory for Molecular Sciences, Key Laboratory of Analytical Chemistry  
for Living Biosystems, Institute of Chemistry, the Chinese Academy of Sciences (CAS), Beijing  
100190, China.*

\* Corresponding author. Fax: +86-10-62559373. E-mail: [lqmao@iccas.ac.cn](mailto:lqmao@iccas.ac.cn)

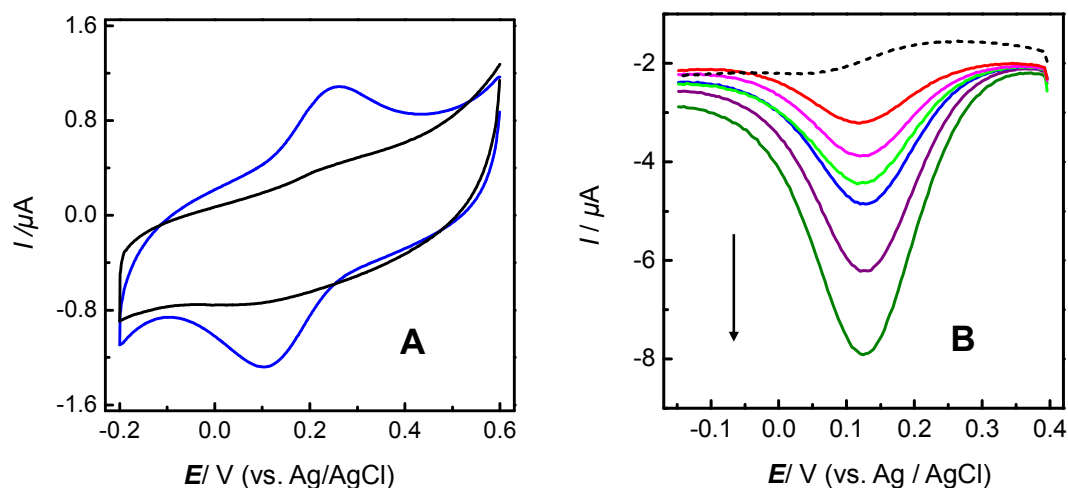

**Figure S1.** (A) Typical CVs obtained with the cysteine-modified Au electrodes in  $\text{Cu}^{2+}$ -free 0.10 M acetate buffer (pH 5.0). The electrodes were first immersed into 0.10 M acetate buffer (pH 5.0) in the absence (black curve) and presence of  $1.0 \mu\text{M}$   $\text{Cu}^{2+}$  (blue curve) for 5 min, and then taken out from the buffer and washed with water. (B) Typical SWVs obtained with the cysteine-modified Au electrodes in  $\text{Cu}^{2+}$ -free 0.10 M acetate buffer (pH 5.0). The electrodes were first immersed into 0.10 M acetate buffers (pH 5.0) containing  $\text{Cu}^{2+}$  with different concentrations of (from upper to lower) 0,  $1.0 \times 10^{-9}$ ,  $1.0 \times 10^{-8}$ ,  $1.0 \times 10^{-7}$ ,  $1.0 \times 10^{-6}$ ,  $1.0 \times 10^{-5}$ , and  $1.0 \times 10^{-4}$  M for 5 min, and then taken out from the buffers and washed with water. Stripping conditions: frequency 15 Hz; pulse height, 25 mV; and pulse increment, 4 mV.
